# Supplementary material for: Degradation of MONOCULM 1 by APC/CTAD1 regulates rice tillering
Source: PubMed Central journal article supplement — Nat Commun. 2012 Mar 20;3:750–. doi: 10.1038/ncomms1743 (PMC3316885; doi:10.1038/ncomms1743), 2012-03-20
Supplement: ncomms1743-s1.pdf [file ncomms1743-s1.pdf]

|           |                                                                                     |     |
|-----------|-------------------------------------------------------------------------------------|-----|
| TAD1      | -MDHHHHLLPPPPRSPMENSASSKPTTASTPSSRLAAAPSSRVSSAAPHSPSSSAPTFA-----SRT                 | 64  |
| MtCCS52A  | -MDGTGNRRNPPPTSTVGDN-----SPPPEPSPE--LRHVS-RMINSNHYS-SP-----SRT                      | 47  |
| AtCCS52A1 | -MEDEESTPKKKSDSQLN-----LPPSMNRPTVLESERIN-RLIDSNHYHSP-----SKP                        | 49  |
| SRW1      | -MSTNLNPFMNNTPSSSPLK-----GSEKRVKRPISSSSSASLLSSPSRRSR-----PST                        | 51  |
| HCT1      | -MDEFDGFTRPTSSSSAN-----RNSNNSMNRVNNNSNSDSANTVDSRGDAHTRMRQGFEKSPSSPNKKRPT            | 70  |
| FZR1      | MFSPEYEKRILK-----HYSFVARNLFNNFESSTTPTS-----                                         | 33  |
| MmCDH1    | -MQDDYERRLLRQIIQNE-----NTVPCVSEMRRTLTPANSFVSSP-----S                                | 42  |
| HsCDH1    | -MQDDYERRLLRQIVIQNE-----NTMPRVTEMRRTLTPASSFVSSP-----S                               | 42  |
|           |                                                                                     |     |
| TAD1      | VYSDR FIPSRAGNLALFDLAPSPSHHDAAAAAASPGAPPSPGSGTPASSPVCALLRAALFG-----                 | 125 |
| MtCCS52A  | IYSDR FIPSRSAK FALFDINTP-----TEGRDSSSAITPLLRALFGPDVAG-----                          | 96  |
| AtCCS52A1 | IYSDR FIPSRSGNFALFDLASS-----SPNK--KDGKEDGAGSAYALLKALFG-----                         | 97  |
| SRW1      | VYQDR FIPSRIDDFNSIVSISSMASVPALNPSSTEDQVEYQKERQAHETNLLKNEELFG-----                   | 115 |
| HCT1      | NEGDR FIPSRDASTELWTGFTKVEG-----PLTPVKKQSVADRNETLLRSEELFGSNIEFFNNSPTATPNTTG          | 140 |
| FZR1      | --LDR FIPGRAYINWQTN-FASINKSNDNSPQTSKKQRDCG-ETARDSLAVSLLKNEELFG-----                 | 90  |
| MmCDH1    | KHGDR FIPSRAGNWSVN-FHRINE-NEKSPSQNRKAKDATSDNGKDGLANSAALLKNEELFG-----                | 101 |
| HsCDH1    | KHGDR FIPSRAGNWSVN-FHRINE-NEKSPSQNRKAKDATSDNGKDGLANSAALLKNEELFG-----                | 101 |
|           |                                                                                     |     |
| TAD1      | -----PTTPDRVASSASAC-----SSSSSAGASPVGSPAT-----                                       | 155 |
| MtCCS52A  | -----FVTPE-----KTDSFSMTLPN-----                                                     | 112 |
| AtCCS52A1 | -----FVTPE-----KSDVVGNSPSS-----                                                     | 113 |
| SRW1      | SKDTVGSSESIDRIKTRPSTRG---NVHAENTTRHGYELERVSTPPPEAAGLEEFSPHSTVTPRRLFTSQQDEITRP       | 191 |
| HCT1      | -VSTPRTDSGIDDIELTQRTTP-----SSSHTSSILQNTVTP-----                                     | 178 |
| FZR1      | -----SAIDDVK-----TAGEERNENAYTPAAK-----                                              | 113 |
| MmCDH1    | -----AGIEKVQ-----DPQTEDRRLLQPSLPEH-----                                             | 124 |
| HsCDH1    | -----AGIEKVQ-----DPQTEDRRLLQPSLPEK-----                                             | 124 |
|           |                                                                                     |     |
| TAD1      | -----GNIFRFKAEVPR-----NAKRALFSDGDDEGLVFPVFTTRGTGPRKIPRSPEYKVLDAPELQDDFY             | 216 |
| MtCCS52A  | -----RNIERFKTETRO-----SMHS--LSPFMDDD--FVPGINHSFPVKAPRKYKVLDAPELQDDFY                | 170 |
| AtCCS52A1 | -----GNIERFKTETOR-----SLN--LYPPFSD--VVGVSFSPVSPKILRSPEYKVLDAPELQDDFY                | 170 |
| SRW1      | SSNSVRGASLLTYQQRKRRLLS-----AASLLQSQFFDSMSFVRPDSKQLLLSPGQFROIAKVYRVLDAPELQDDFY       | 265 |
| HCT1      | -----SRKIFHYLSPDRNKSSYGKKAQYQDNPNRTIYSLSPVRSITKDLISASRLEGRELPSIPYRVLDAPELQDDFY      | 252 |
| FZR1      | -----RSLFKYQSPTKQ-----DYNCEPCYSLSPVSAKSQKLLRSRPRKATRKISRIPIPKVLDAPELQDDFY           | 174 |
| MmCDH1    | -----KGLFTYSLSSKRSSP-----DDGNDVSPYSLSPVSNKSQKLLRSRPRKPTRKISKIPIPKVLDAPELQDDFY       | 189 |
| HsCDH1    | -----KGLFTYSLSTRSSP-----DDGNDVSPYSLSPVSNKSQKLLRSRPRKPTRKISKIPIPKVLDAPELQDDFY        | 189 |
|           |                                                                                     |     |
| TAD1      | LNLVDWSSHNILAVCLGNCVYLWACSSKVTKLCDLGVD-DNYCSVGNARQGHVAVGTNQGKVVWDATRCRIRRTMES       | 295 |
| MtCCS52A  | LNLVDWSSHNVLAVCLGNCVYLWACSSKVTKLCDLGVD-DGVCVGNARQGHVAVGTNNGKVVWDAAARCKIRSMEG        | 249 |
| AtCCS52A1 | LNLVDWSSAQNVLAVCLGNCVYLWACSSKVTKLCDLGVD-ETVCSVGNALRGTHLAVGTSSGTVQTDVLRCKNIRTMEG     | 249 |
| SRW1      | YSLIDWSSTDVAVLALGKSIETLDDNNTGCVVHLCDFENE---YTSLSVIGAGSHLAVGQANGVETVDVMKRCIRTLSG     | 342 |
| HCT1      | LNLLDWGQCNMLAVLALASRVYLVSGISSEVTVMHNFYPT-DTIVTSLRNVQRGTHLAVGTNNGSVEIWDAAATCKRTRTMSG | 331 |
| FZR1      | LNLVDWSSONVAVLAVCLGNCVYLWACSSKVTKLCDLSPDANTVTSVSNBERGNTVAVGTHHGCVTVDVAANKQINKLNG    | 254 |
| MmCDH1    | LNLVDWSSINVLAVCLGNCVYLWACSSKVTKLCDLVSGGDSVTVSVGNBERGNLVAVGTTHKGFVQIWDAAAGKKLMSLEG   | 269 |
| HsCDH1    | LNLVDWSSINVLAVCLGNCVYLWACSSKVTKLCDLVSGGDSVTVSVGNBERGNLVAVGTTHKGFVQIWDAAAGKKLMSLEG   | 269 |
|           |                                                                                     |     |
| TAD1      | HRMRVGAIAWSSSLSSGSRDKSLHHDIRA-QDDYISRLACHKSEVCGLKWSYDNRQLASGGNDNRLYVWNQHSIAHPVL     | 374 |
| MtCCS52A  | HRIRVGAIAWSSSLSSGSRDKNRYORDIRT-QEDFVSKLSCHKSEVCGLKWSYDNRRELASGGNDNKLFWVWNQHSIQPVL   | 328 |
| AtCCS52A1 | HRIRVGAIAWSSSLSSGSRDKSLORDIRT-QEDHVSKLCHKSEVCGLKWSYDNRRELASGGNDNKLFWVWNQHSIQPVL     | 328 |
| SRW1      | HIDRVACLSWNNHVLSSGSRDHRILHRDVRM-PDPFFETIESHTQEVCGLKWVADNKLASGGNDNVVHVYEGTSSKSPIL    | 421 |
| HCT1      | HTIRVGAIAWSSSLSSGSRDHRILHRDVRM-PEHYFRVLTAFHROEVCGLEWNSNENLLASGGNDNKLFWVWNQHSIAHPVL  | 410 |
| FZR1      | HSARVGAIAWSSSLSSGSRDHRILORDIRPPLQSERLQCHROEVCGLKWSYDNRQLASGGNDNRLYVWNQHSVNPVQ       | 334 |
| MmCDH1    | HTARVGAIAWSSSLSSGSRDHRILORDIRPPLQSERLQCHROEVCGLKWSYDNRQLASGGNDNKLFWVWNQHSVNPVQ      | 349 |
| HsCDH1    | HTARVGAIAWSSSLSSGSRDHRILORDIRPPLQSERLQCHROEVCGLKWSYDNRQLASGGNDNKLFWVWNQHSVNPVQ      | 349 |
|           |                                                                                     |     |
| TAD1      | KYTEHAAVKAIAWSPHHLHGHLASGGGTADRCLRFWNTLTFNMHLNCDVDTGSQVCNVLVSKNVNVELVSTHGYSOQIIVWR  | 454 |
| MtCCS52A  | KYCEHAAVKAIAWSPHHLHGHLASGGGTADRCLRFWNTLTFNSHLSLSCMDTGSQVCNVLVSKNVNVELVSTHGYSOQIIVWR | 408 |
| AtCCS52A1 | RFEHAAVKAIAWSPHHLHGHLASGGGTADRCLRFWNTLTFNTHLNCVDVDTGSQVCNVLVSKNVNVELVSTHGYSOQIIVWR  | 408 |
| SRW1      | TFDEHAAVKAIAWSPHRRGGLASGGGTADRRLKINWNTSKMSDLDSSGQICNMVWSKNTNELVSHHGYSKYNLTFWD       | 501 |
| HCT1      | SEHNHAAVKAIAWSPHQRGLASGGGTADRTEKLWNTORGSMHLNIDTGSQVCNVLVSKNVNVELVSTHGEMENEVALWN     | 490 |
| FZR1      | SYTEHAAVKAIAWSPHHLHGHLASGGGTADRCLRFWNTLTFGQPMQCVDTGSQVCNVLVSKNVNVELVSTHGYSOQIIVWR   | 414 |
| MmCDH1    | QYTEHAAVKAIAWSPHHLHGHLASGGGTADRCLRFWNTLTFGQPLQCIDTGSQVCNVLVSKNVNVELVSTHGYSOQIIVWR   | 429 |
| HsCDH1    | QYTEHAAVKAIAWSPHHLHGHLASGGGTADRCLRFWNTLTFGQPLQCIDTGSQVCNVLVSKNVNVELVSTHGYSOQIIVWR   | 429 |
|           |                                                                                     |     |
| TAD1      | YPTMSKLAALTLGHTYRV.YLALHSPDQOTIVTGAGDETLRFWNVFP-SPKSQSSDSLSEIGATSFVRSYIR            | 513 |
| MtCCS52A  | YPTMSKLAALTLGHTYRV.YLALHSPDQOTIVTGAGDETLRFWNVFP-SPKSQNTSE--SEIGALSLGRITTR           | 415 |
| AtCCS52A1 | YPTMSKLAALTLGHTYRV.YLALHSPDQOTIVTGAGDETLRFWNVFP-SPKSQSRSE--SEIGALSFGRITTR           | 415 |
| SRW1      | CNSMDPIALTKGHSYRV.HLHLSNDGTIVVSGAGDETLRFWVWLEF-KPKAKVQPNSLIFDAFNQIR                 | 566 |
| HCT1      | YPSVSRVGTLLKGHTRV.YLALHSPDQOTIVTGAGDETLRFWVWLEFDSKSKHSASTMSFPDPTMKIR                | 556 |
| FZR1      | YPSLTQVAKLTGHSYRV.YLALHSPDQEAIVTGAGDETLRFWNVFS-KARS-QKENKSVLNLNFANIR                | 478 |
| MmCDH1    | YPSLTQVAKLTGHSYRV.YLALHSPDQEAIVTGAGDETLRFWNVFS-KTRS-TKESVSVLNLNFTRIR                | 493 |
| HsCDH1    | YPSLTQVAKLTGHSYRV.YLALHSPDQEAIVTGAGDETLRFWNVFS-KTRS-TKESVSVLNLNFTRIR                | 493 |

## Supplementary Figure S1 Alignment of TAD1 and its homologues.

TAD1 and its homologous proteins contain different functional domains or motifs, including C-box (blue tangle), CSM (green tangle), WD repeats (red underlined), RVL (purple tangle), and IR (bright blue tangle). The red triangle indicates the mutation site in *tad1*. Accession numbers: TAD1, ABF93719; MtCcs52A, AF134835; AtCcs52A1, Q8L3Z8; SpSrw1, O13286; ScHct P53197. DmCdh1, NP\_726941, MmCdh1, NP\_062731; HsCdh1, NP\_057347.

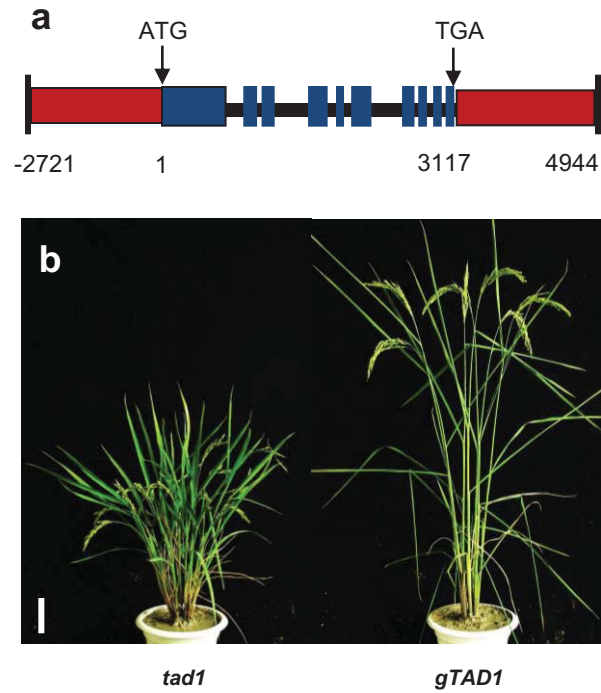

**Supplementary Figure S2 Complementation test of *tad1*.** (a) Schematic diagram of the complementation plasmid containing the entire *TAD1* (*gTAD1*). (b) Rescued phenotypes of *tad1* by transferring the complementation plasmid *gTAD1* into the *tad1* mutant plant. Scale bar, 10 cm.

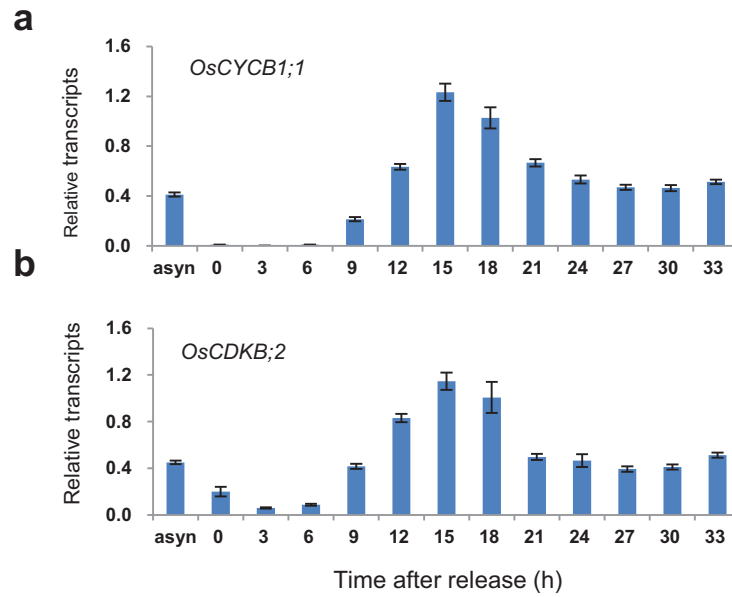

**Supplementary Figure S3 Expression patterns of G2/M phase maker genes during the cell cycle progression.** (a, b) The relative transcript levels of *OsCYCB1;1* (a) and *OsCDKB;2* (b) in suspension cells at indicated time points released from synchronization. Transcript levels were analyzed by Real-time PCR using the rice *Actin* gene as the internal control. Values are means with SD of three independent experiments (n = 3).

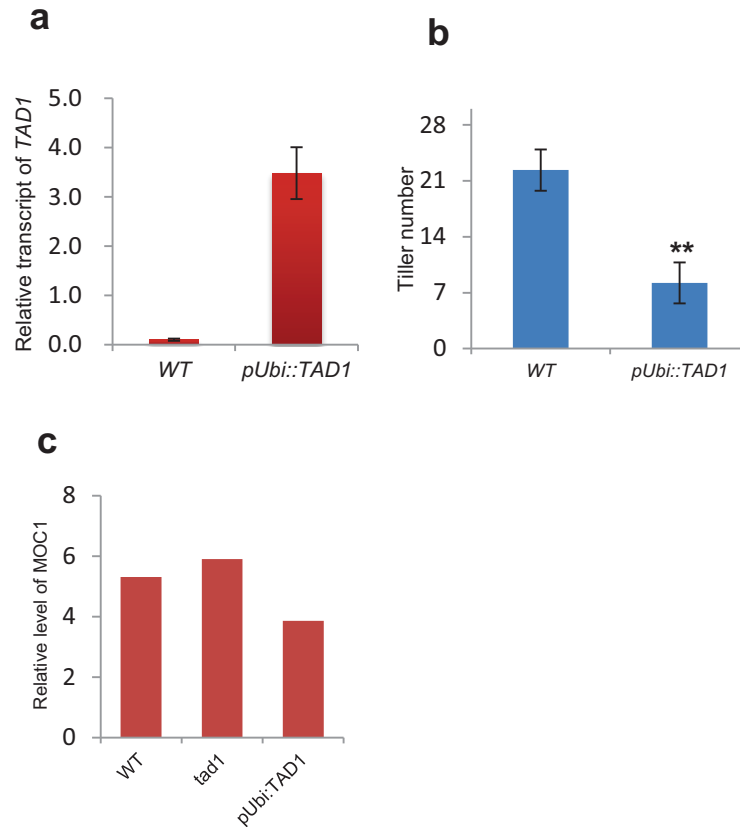

**Supplementary Figure S4 Overexpression of *TAD1* leads to the decreased tiller number in transgenic plants.** (a) *TAD1* expression levels in wild-type and *TAD1*-overexpressing transgenic plants analyzed by Real-time PCR using rice *Actin* gene as the internal control. Values are means with SD of three independent experiments (n = 3). (b) Comparison of tiller number between the wild type and *TAD1*-overexpressing transgenic plants. Values are means with SE (n = 9 plants). The double asterisks indicate the significant difference determined by two-tailed t-test at P < 0.01. (c) Relative protein levels of MOC1 in the wild-type, *tad1* and *TAD1*-overexpressing transgenic plants. The immunoblot signals of MOC1 and Actin were quantified using Quantity One software (Bio-Rad). The relative protein levels of MOC1 were generated by normalization against the protein levels of Actin in the three samples mentioned above.

**Supplementary Table S1. PCR-based molecular markers developed in this study**

| Name   | BACs     | Forward sequence (5'-3') | Reverse sequence(5'-3') |
|--------|----------|--------------------------|-------------------------|
| S7206  | AC105733 | CTTGTGACAATACAGAGACAAGC  | TACCTCTCCCATCCGATTC     |
| S7999  | AC134236 | GATGGGATTTGATTCCACAG     | CACAGTTGGGAAATTTGTCC    |
| S9681  | AC119747 | GACATCCGGTCAAATGTTCC     | GTTCAAGCCGTAGCTCTTCC    |
| S1396  | AP000615 | AGCTGGATACCAGCAGTGG      | CATGTCCATGTTAAATAGTGCC  |
| RM4683 | AP008209 | TACAGCAACAATCTTTAACC     | TAGAGGGAGTATTGTGCTAG    |
| S9110  | AC105363 | CCAGTGTGATTGCTGCTCC      | GATTCGGATTCGAACTGGC     |
| RM523  | AC098695 | AAGGCATTGCAGCTAGAAGC     | GCACTTGGGAGGTTTGCTAG    |
| S1273  | AC098695 | AGCATAACATCAAAGCCATG     | ACTGCCTAGCTAGATAAGTTAGC |
| S3837  | AC119747 | GACACACAATTTGCTATGGACG   | GGTCCGGGAGAACAATGC      |

**Supplementary Table S2. Predicted genes/ORFs between markers RM523 and S1273**

| <b>Accession number</b> | <b>Annotation</b>                        |
|-------------------------|------------------------------------------|
| LOC_Os03g03130          | ubiquitin-conjugating enzyme             |
| LOC_Os03g03140          | RNA recognition motif containing protein |
| LOC_Os03g03150          | WD40 repeat-containing protein           |
| LOC_Os03g03164          | homeobox protein knotted-1               |

**Supplementary Table S3. Primer sequences for generating DNA constructs**

| <b>Construct</b>     | <b>Primer name</b> | <b>Sequence (5'-3')</b>                |
|----------------------|--------------------|----------------------------------------|
| <i>gTAD1</i>         | gTAD1F1-F          | CTACAGCGACCGCTTCATC                    |
|                      | gTAD1F1-R          | GTAGCTCCTAACAAATGATGTGG                |
|                      | gTAD1F2-F          | TGTTTCCATCTCCCAAGTCC                   |
|                      | gTAD1F2-R          | GGGGTACCCACTTCTCTGAGTGAGACCATCC        |
| REP5N-TAD1           | 5NTAD1-F           | CTCGAGATGGATCACCACCACCACC              |
|                      | 5NTAD1-R           | GCGGCCGCTTACCGGATGTAGCTCCTAAC          |
| REP2-TAD1            | REPTAD-F           | CATATGATGGCGGGGGGGCTC                  |
|                      | REPTAD-R           | GGATCCCCGTATGTGGCTTCTCGAG              |
| pUbi::TAD1           | TAD1OE-F           | GGGGTACCATGGATCACCACCACCACCAC          |
|                      | TAD1OE-R           | CGACTAGTTCACCGGATGTAGCTCCTAA           |
| TAD1- <i>in situ</i> | SKTAD1-F           | GCGAATTCTCCCAAGTCCCAGAGTTCTG           |
|                      | SKTAD1-R           | ACGGATCCCCAGCTCCAAGTTGACTCAG           |
| SCN-TAD1             | SCNTAD1-F          | CAACTAGTATGGATCACCACCACCACCAC          |
|                      | SCNTAD1-R          | CCGGTACCCCGGATGTAGCTCCTAACAAAT         |
| SCNTAD1-N203         | SCNTAD1-F          | CAACTAGTATGGATCACCACCACCACCAC          |
|                      | N203R              | GGGGTACCATAAGGTGACCTAGGGATCT           |
| SCNTAD1-WD           | WD-F               | GCGCGGATCCAAGGTGCTGGATGCTCCCGCATTG     |
|                      | WD-R               | GGGGTACCGTTCCAAAACCGAAGCGTTTC          |
| SCNTAD1-C398         | C398-F             | CAACTAGTATGACGCCCGACCGGGTGGCGT         |
|                      | SCNTAD1-R          | CCGGTACCCCGGATGTAGCTCCTAACAAAT         |
| SCNTAD1-C410         | C410-F             | GCGCGGATCCCCCTACTGCGCGCTCCTC           |
|                      | SCNTAD1-R          | CCGGTACCCCGGATGTAGCTCCTAACAAAT         |
| SCNTAD1-C456         | C456-F             | CTAGTCTAGAGACCGCTTCATCCCCAGCC          |
|                      | SCNTAD1-R          | CCGGTACCCCGGATGTAGCTCCTAACAAAT         |
| SCNTAD1-N460         | SCNTAD1-F          | CAACTAGTATGGATCACCACCACCACCAC          |
|                      | N460-R             | CCGGTACCCTTTGACATTGTTGGGTATC           |
| pActin::MOC1-GFP     | MOC1GFP-F          | GGACCCGGGATGCTCCGGTCACTCCACTCC         |
|                      | MOC1GFP-R          | CGGTCTAGACGACGACGACGGCTGCCAC           |
| SCC-MOC1             | SCCMOC1-F          | CGGGATCCATGCTCCGGTCACTCCACTCC          |
|                      | SCCMOC1-R          | CCGGTACCCGACGACGACGGCTGCCAC            |
| SCC-mMOC1            | mMOC1-F            | CGGCGCCGTCGACGGCGGACTTGGCGCTGGCGTGCGCG |
|                      | mMOC1-R            | CGCGCACGCCAGCGCCAAGTCCGCCGTCGACGGCGCCG |
| SF-OsAPC10           | OsAPC10-F          | CGGGGGATCCATGGAATCCGACGGCGAGGAG        |
|                      | OsAPC10-R          | GGGGTACCCCTAACAGTAGAGTAGGTGAC          |

**Supplementary Table S4. Primer sequences for real-time PCR analyses**

| <b>Primer name</b> | <b>Sequence (5'-3')</b>    |
|--------------------|----------------------------|
| QTAD1-F            | GCAGTCGTGACAAGAGCATCCT     |
| QTAD1-R            | AGCCACAGACCTCCGATTTATG     |
| QActin-F           | CTTCATAGGAATGGAAGCTGCGGGTA |
| QActin-R           | CGACCACCTTGATCTTCATGCTGCTA |
